# Supplementary material
Source: publisher site journal article supplement (https://www.spandidos-publications.com/2400/downloadSupplementary)
Supplement: Supplementary file 1 [file downloadSupplementary]

## Sheet: Sheet1
Table SIII. Functional analysis using HaploReg v4.1.
Variant	Promoter histone marks	Enhancer histone marks	DNase hypersensitivity	Motifs changed	dbSNP functional annotation
rs7115242	BLD, GI, BONE (Primary T cells from cord blood, Primary hematopoietic stem cells G-CSF-mobilized Male, Duodenum Mucosa, Osteoblast Primary cells）	20 tissues (ES-I3 Cells, H1 Cells, H1 BMP4 Derived Mesendoderm Cultured Cells, H1 Derived Neuronal Progenitor Cultured Cell, H9Cells, H9 Derived Neuron Cultured Cells, hESC Derived CD56+ Mesoderm Cultured Cells, HUES48 Cells, HUES6 Cells, HUES64Cells, IMR90 fetal lung fibroblasts Cell Line iPs-15b Cells, ips-20b Cells, Me Mesenchymal Stem Cell Derived Adipocyte Cultured Cells, ES-UCSF4 Cells, Adi…	21 tissues (H1 BMP4 Derived Mesendoderm Cultured Cells, H1 Derived Neuronal Progen itor Cultured ells iPS DF 6.9 Cells, Breas variant Human Mammary Epithelial Cells (VHMEC), Primary B cells from peripheral blood, Primary T cells from cord blood,Primary T cells from peripheral blood, Primary hematopoietic stem cells G-CSF-mobilized Male, Foreskin Fibroblast Primary Cells skin01, Foreskin Fibroblas…	KAP1	intronic
rs191188930	￣	7 tissues (IMR90 fetal lung fibroblasts Cell Line,Mesenchymal Stem Cell Derived Adipocyte Cultured Cells,Adipose Derived Mesenchymal Stem Cells,Foreskin Fibroblast Primary Cells skin01,Foreskin Fibroblast Primary Cells skin02,Foreskin Fibroblast Primary Cells skin03,Fetal Muscle Leg,Placenta,Ovary,Right Atrium）	8 tissues (H1 Derived Mesenchymal Stem Cells,IMR90 fetal lung fibroblasts Cell Line,Foreskin Fibroblast Primary Cells skin01,Foreskin Fibroblast，Primary Cells skin02,Placenta,Psoas Musles,NHDF-Ad Adult Dermal Fibroblast Primary Cells,NHEK-Epidermal Keratinocyte Primary Cells）	Dmbx1,GCNF	intronic
rs142136033	￣	19 tissues (ES-I3 Cells,H1 Derived Mesenchymal Stem Cells,H1 Derived Neuronal Progenitor Cultured Cells,hESC Derived CD56+ Mesoderm Cultured Cells,IMR90 fetal lung fibroblasts Cell Line,Mesenchymal Stem Cell Derived Adipocyte Cultured Cells,Adipose Derived Mesenchymal Stem Cells,Breast Myoepithelial Primary Cells,Breast variant Human Mammary Epithelial Cells(vHMEC),Mesenchymal Stem Cell Derived C…	14 tissues (H1 Derived Mesenchymal Stem Cells, IMR90 fetal lung fibroblasts Cell Line, Foreskin Fibroblast Primary Cells skin02, Fetal Heart,Fetal Lung,Fetal Muscle Trunk,Fetal Muscle Leg, Placenta, Fetal Stomach, Psoas Muscle,HSMM Skeletal Muscle Myoblasts Cells, HSMM cell derived Skeletal Muscle Myoblasts Cells, NHDF-Ad Adult Dermal Fibroblast Primary Cells,NHEK-Epidermal Keratinocyte Primary C…	5 altered motifs (Ets,FEV,HMG-IY,IK-3,STAT）	intronic
rs143160639	23 tissues (ES-I3 Cells ES-WA7 Cells, H1 Cells, H1 BMP4 Derived Mesendoderm Cultured Cells, H1 BMP4 Derived Trophoblast Cultured Cells, H1 Derived Mesenchymal Stem Cells, H1 Derived Neuronal Progenitor Cultured Cells, H9 Cells, H9 Derived Neuronal Progenitor Cultured Cells, H9 Derived Neuron Cultured Cells, hESC Derived CD184+ Endoderm Cultured Cells, hESC Derived CD56+ Ectoderm Cultured Cells, h…	6 tissues (Primary B cells from cord blood, Primary T CD8+ naive cells from peripheral blood, Fetal Brain Male, Left Ventricle, Lung, Stomach Mucosa, Spleen）	19 tissues (H1 Derived Neuronal Progenitor Cultured Cells, H9 Cells, Primary B cells from peripheral blood, Primary T cells fr blood. Primary T cells from peripheral blood, Primary Natural Killer cells from penipheral blood, Primary hematopoietic stem cells G-CSF-mobilized Male, Foreskin Melanocyte Primary Cells skin01, Fetal Heart, Fetal Stomach, Fetal Thymus, Ovary,Psoas Muscle, GM12878 Lymphob…	28 bound proteins(POL2, ERALPHA A, EBF1,OCT2, POU2F2, SIN3AK20, ZNF143, YY1, SP1, TAF1, TBP, POL24H8 MAX, E2F4, E2F6, HAE2F1, MXI1, POL2S2, C HD2, HDAC2, HEY1, P300, CCNT2, CMYC, EGR1, ETS1, GABP, USF1, BIRC5)	missense
rs113139165	￣	HRT (Fetal Heart）	13 tissues (H1 Derived Mesenchymal Stem Cells, iPS DF 6.9 Cells, Foreskin Keratinocyte Primary Cells skin02, Foreskin Melanocyte Primary Cells skino1, Fetal Brain Male, Fetal Brain Female, Fetal Heart, Fetal Muscle Leg, A549 EtOH 0.02pct Lung Carcinoma Cell Line, HeLa-S3 Cervical Carcinoma Cell Line, HMEC Mammary Epithelial Primary Cells, HSMM cell derived Skeletal Muscle Myotubes Cells, NHDF-Ad …	CTCF,RAD21,SMC3,ERBB4	intronic
rs870064	BLD, CRVX (Primary neutrophils from peripheral blood,HeLa-S3 Cervical Cell Line,Monocytes-CD14+RO01746 Primary Cells）	9 tissues (Primary momocytes from peripheral blood, Primary B cells from cord blood, Primary B cells from peripheral blood,Primary hematopoietic stem cells, Primary hematopoietic stem cells short come culture,Primary Natural Killer cells from peripheral blood, Primary hematopoietic stem cells G-CSF-mobilized Male, Adipose Nuclei,Liver, Fetal Intestine Small,Fetal Intestine Large,Duodenum Mucosa, …	11 tissues (Primary momocytes from peripheral blood, Fetal Intestine Small,Fetal Intestine Large, Placenta, Fetal Stomach, Gastric,Pancereas,A549 EtOH0.02pct Lung Carcinoma Cell Line,HeLa-S3 Cervical Carcinoma Cell Line, HepG2 Hepatocellular Carcinoma Cell Line)	PPAR,RXRA	￣
rs141452045		ESDR, FAT, SKIN (H1 BMP4 Derived Trophoblast Cultured Cells, Adipose Derived Mesenchymal Stem Cell Cultured Cells, Foreskin Fibroblast Primary Cells skin01,Foreskin Fibroblast Primary Cells skin02)	6 tissues (H1 Cells, H1 BMP4 Derived Mesenchymal Stem Cells,iPS DF 6.9 Cells, Foreskin Fibroblast Primary Cells skin01,Foreskin Fibroblast Primary Cells skin02, Fetal Kidney,)	EBF	intronic
rs117153772	5 tissues (Bone Marrow Derived Cultured Mesenchymal Stem Cells, Foreskin Fibroblast Primary Cells skin02, A549 EtOH0.02pct Lung Carcinoma Cell Line,HUVEC Umbilical Vein Endothelial Primary Cells, NHEK-Epidermal Keratinocyte Primary Cells）	16 tissues (ES-I3 Cells, ES-WA7 Cells,H1 Cells, H1 BMP4 Derived Trophoblast Cultured Cells,H9 Cells, H9 Derived Neuronal Progenitor Cultured Cells, H9 Derived Neuron Cultured Cells,HUES48 Cells,HUES6 Cells, HUES64 Cells, IMR90 fetal lung fibroblasts Cell Line,iPS-15b Cells, iPS-18 Cells, iPS-20b Cells, iPS DF 19.11 Cells, Mesenchymal Stem Cell Derived Adipocyte Cultured Cells, Adipose Derived Mes…	23 tissues (H1 BMP4 Derived Trophoblast Cultured Cells, H1 Derived Mesenchymal Stem Cells, IMR90 fetal lung fibroblasts Cell Line, Breast variant Human Mammary Epithelial Cells(vHMEC), Foreskin Fibroblast Primary Cells skin01,Foreskin Fibroblast Primary Cells skin02, Foreskin Keratinocyte Primary Cells skin01, Foreskin Keratinocyte Primary Cells skin02,Fetal Brain Male, Fetal Heart, Fetal Lung, O…	￣	intronic
rs111251321	￣	￣	￣	4 altered motifs (Gm397,Pou2f2,Pou3f2,Pou3f3)	intronic
